# Supplementary material for: Synaptosomal Actin Dynamics in the Developmental Visual Cortex Regulate Behavioral Visual Acuity in Rats
Source: PubMed Central journal article supplement — Invest Ophthalmol Vis Sci. 2021 Jun 17;62(7):20. doi: 10.1167/iovs.62.7.20 (PMC8212442; doi:10.1167/iovs.62.7.20), 2021-06-17
Supplement: iovs-62-7-20_s001.pdf [file iovs-62-7-20_s001.pdf]

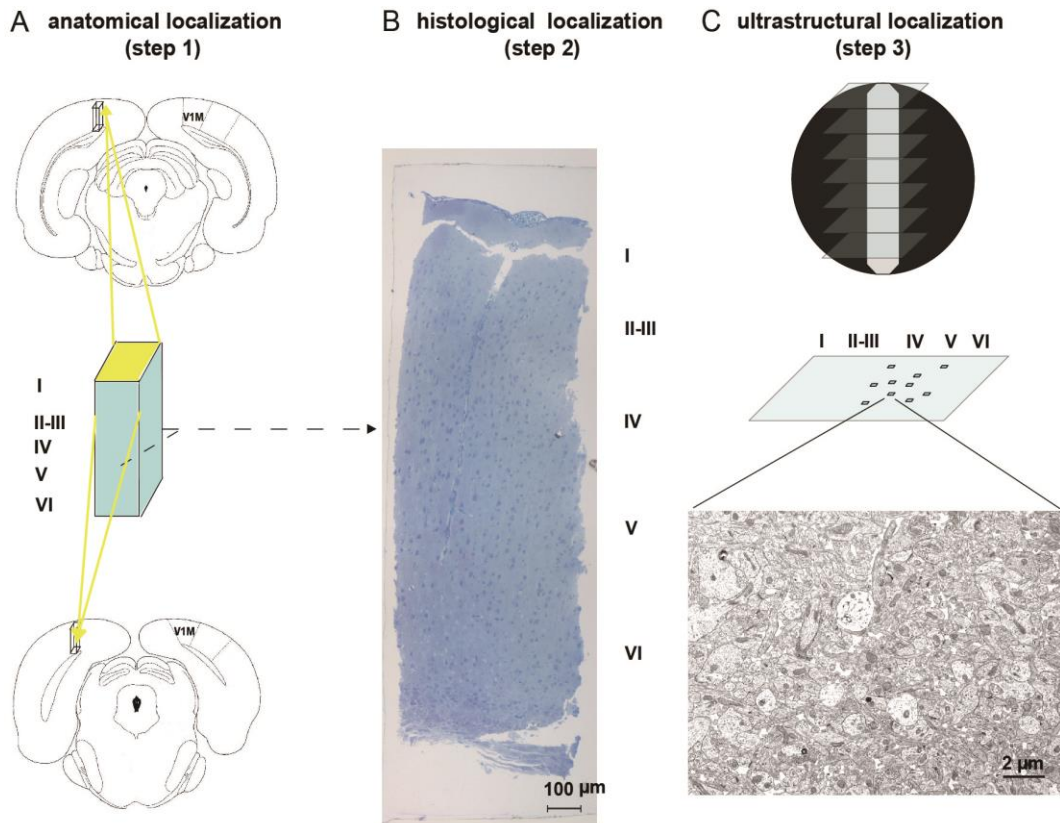

Supplemental Fig. 1 Three-step localization method. (a) Anatomical localization. The VIM tissue used for EM analysis was dissected out. (b) Histological localization. Toluidine blue staining was used to locate the 2  $\mu\text{m}$ -thick semi-thin sections. (c) Ultrastructural localization. 7-9 pieces of serial ultrathin sections were collected on a single-slot grid. Rectangles represent 10 visual fields at 10,000 $\times$  magnification per ultrathin section and a representative visual field at 10,000 $\times$  magnification was shown.
